# Supplementary material for: Characterization of Early Nodulin 93 (ENOD93) on the mucilage secretion of aerial roots in sorghum
Source: Research Square preprint supplement (doi:10.21203/rs.3.rs-7686751/v1), 2025-10-08
Supplement: Supplementary file 1 [file 6c0a3b335f9198d66d2f79ac.pdf]

Arabidopsis\_thaliana\_AT5G25940/1-100  
Brachypodium\_distachyon\_Brad1g51080/1-89  
Brachypodium\_distachyon\_Brad1g51090/1-89  
Brachypodium\_distachyon\_Brad3g08630/1-89  
Glycine\_max\_Glyma.05G008900/1-95  
Glycine\_max\_Glyma.05G009000/1-100  
Glycine\_max\_Glyma.05G009100/1-65  
Glycine\_max\_Glyma.06G216500/1-96  
Glycine\_max\_Glyma.17G117100/1-100  
Glycine\_max\_Glyma.17G117150/1-68  
Glycine\_max\_Glyma.17G117200/1-100  
Glycine\_max\_Glyma.17G192100/1-100  
Oryza\_sativa\_Os02g0227200/1-88  
Oryza\_sativa\_Os06g0141400/1-100  
Oryza\_sativa\_Os06g0141600/1-74  
Oryza\_sativa\_Os06g0141700/1-89  
Oryza\_sativa\_Os06g0142200/1-89  
Oryza\_sativa\_Os06g0142300/1-89  
Oryza\_sativa\_Os06g0142350/1-74  
Oryza\_sativa\_Os06g0142400/1-89  
Physcomitrium\_patens\_Pp3c10\_3120/1-100  
Physcomitrium\_patens\_Pp3c15\_22070/1-100  
Setaria\_italica\_Seta.1G029100/1-89  
Setaria\_italica\_Seta.4G029900/1-86  
Setaria\_italica\_Seta.4G030000/1-90  
Setaria\_italica\_Seta.4G030100/1-90  
Setaria\_italica\_Seta.4G030200/1-89  
Setaria\_italica\_Seta.4G030300/1-89  
Setaria\_italica\_Seta.4G030400/1-89  
Setaria\_italica\_Seta.4G030500/1-89  
Sorghum\_bicolor\_Sobic.004G099900/1-89  
Sorghum\_bicolor\_Sobic.010G031100/1-89  
Sorghum\_bicolor\_Sobic.010G031400/1-91  
Sorghum\_bicolor\_Sobic.010G031600/1-91  
Sorghum\_bicolor\_Sobic.010G031900/1-89  
Sorghum\_bicolor\_Sobic.010G032000/1-89  
Sorghum\_bicolor\_Sobic.010G032100/1-89  
Solanum\_lycopersicum\_Solyc08g066160.3/1-100  
Solanum\_lycopersicum\_Solyc08g066170.3/1-83  
Solanum\_lycopersicum\_Solyc12g006560.3/1-81  
Solanum\_lycopersicum\_Solyc12g006680.2/1-87  
Zea\_mays\_Zm00001eb205020/1-82  
Zea\_mays\_Zm00001eb270310/1-95  
Zea\_mays\_Zm00001eb37390/1-89  
Zea\_mays\_Zm00001eb377400/1-89  
Zea\_mays\_Zm00001eb377410/1-90  
Arachis\_hypogaea\_arahy.Tifrunner.gnm1.ann1.33VMBzLRDMVSRRE-SFLI  
Arachis\_hypogaea\_arahy.Tifrunner.gnm1.ann1.6SKZ8LRDMVSRRE-SFLI  
Arachis\_hypogaea\_arahy.Tifrunner.gnm1.ann1.ED9HPfIAKINN  
Arachis\_hypogaea\_arahy.Tifrunner.gnm1.ann1.KXQV93MAKGNVNT  
Arachis\_hypogaea\_arahy.Tifrunner.gnm1.ann1.KZF81UfAKGNN  
Arachis\_hypogaea\_arahy.Tifrunner.gnm1.ann1.WT3AEIMAKGNVNT  
Cicer\_arietinum\_Ca.03357\_v3/1-100  
Cicer\_arietinum\_Ca.21700\_v3/1-100  
Lupinus\_albus\_Lalb\_Chr07g017871/1-100  
Lupinus\_albus\_Lalb\_Chr12g019780/1-100  
Lupinus\_albus\_Lalb\_Chr13g030200/1-142  
Lupinus\_albus\_Lalb\_Chr13g030201/1-100  
Lupinus\_albus\_Lalb\_Chr24g0402691/1-100  
Medicago\_truncatula\_Medtr1g007360/1-100  
Medicago\_truncatula\_Medtr4g110390/1-100  
Phaseolus\_vulgaris\_Phvu1.001G074600/1-100  
Phaseolus\_vulgaris\_Phvu1.003G162150/1-100  
Phaseolus\_vulgaris\_Phvu1.003G162200/1-100  
Phaseolus\_vulgaris\_Phvu1.009G198400/1-96  
Pisum\_sativum\_Psat2g066360/1-100  
Pisum\_sativum\_Psat4g044920/1-100  
Pisum\_sativum\_Psat4g045000/1-64  
Pisum\_sativum\_Psat4g045040/1-100  
Pisum\_sativum\_Psat4g045160/1-100  
Pisum\_sativum\_Psat5g018360/1-100  
Pisum\_sativum\_Psat6g036120/1-96  
Trifoliumpratense\_TPR.G10686/1-100  
Trifoliumpratense\_TPR.G12397/1-100  
Trifoliumpratense\_TPR.G24507/1-78

Right click  
to add annotation

102030405060708090100

RSEMGNNRQQNL FV I ASPDE I AK I HRAETSKQAGA I AGAKAAAVAVAS A I P T VAAVRMPWAKANL - NYTAAQAL I I SSAS I A AFF I TADKT I LQGARRNT  
-----MS- TVTGAYLDRKLAL AKRCSRE ATL AGAKAAAVAT VAS AVPTLAS VRMLPWAKANL - NPTGQAL I VCTAAGMAYFVAADKT I LSLARRHS  
-----MSTTVSRAYLDORLAAAKRCSKE AAMAGAKAAAVATVAAAVPTLAS VRMLPWARAHL - NPTGQAL I I STVAGMAYF I VADKT I L SMARKHS  
-----MASRN - FL I RSPKEEE - - - - SNAAVRE A I L LGGKNAA I AGTVVAVPTLVGCRVFPWAKRNL - NYTAAQAL I I TAAC I AGFF I TADKT I L RNARQNT  
-----MLLL I L LERS TLASLDQKLAMAKHCSHEGVMAGAKAAVVAT I A T A I P T L A S V R T I P W A R A N L - N P T A Q A L I I S T V A G A A Y F I V A D K T V L A T A R K N S  
MAQRNVTANSSFERTSLPSLDQKLAMAKRCSHEGVMAGAKAAVVAT I A T A I P T L A S V R M L P W A K A N L - N H S A Q A L I I S T V A G A A Y F I A D K T V L A T A R K N S  
----- - MAGAKTAVAAS I A T A I P T L A S V R M L P W A K A N L - N H T A Q A L I I S T V T G A A Y F I A D K T V L A T A R K N S  
MAKGN - - - - S P L E R P S L A S L D Q K L A F A K R C S H E G V L A G A K A A V V A S A I P T L A S V R M L P W A K A N L - N H T A Q A L I I S T A T A A A Y F I A D K T V L A T A R K N S  
MAKRNVAANSSFERS TLASLDQKLAMAKRCSHEGVMAGAKAAVVAT I A T A I P T L A S V R M L P W A K A N L - N H T A Q A L I I S T V A G A A Y F I V A D K T V L A T A R K N S  
----- - MRVMAGAKATVVAT I A T T I P T L A S V R M L P R A R A N L - N H T A Q A L I I F H S G G S S I F Y S S S Q D R F G N C K K E L  
MAKRSVAANSSFESTLASLDQKLAMAKRCSHEGVMAGAKAAVVAT I A T A I P T L A S V R M L P W A K A N L - N H T A Q A L I I S T V A G A A Y F I V A D K T V L A T A R K N S  
LRDMLLPNKK - GVLVASPAEDRKT LRSKQCTREGVRAGFKAAS I AGVASAVPTL AAVRMI PWAKANL - NYTAAQAL I I SAAS I ASYF I TADKT I L ECARKNA  
-----MAARS - FOARSPKEE - - - - SDAAVHEAVTLGLKNAA I SGTVVAVPTLVGCRVLPWAKANL - NYTAAQAL I I SAAC I AGFF I TADKA I L RNARQNT  
- I ESNPSPAGATKYCG I A I L I CWT LRLRRS I SEAA I AGLKAAAVTAVCTA I PTFASVRMSKWAKANLGNPVAKTV I I I TYAAGMAYF I AGEKKVVELSRKHS  
----- - MLRRS A E A N L A G V K A A A V A T I A S A V P T L A S V R M P W A K A N I - N P T G Q A L I I C T A A G M A Y F V A A D K K I L S L A R R H S  
-----MS- TVTRAYLDQKLAL AKRCSRE ATL AGAKAAAVAT VAS AVPTLAS VRMLPWAKAN I - NPTGQAL I I CTAAGMAYFVAADKK I LSLARRHS  
-----MA- TVTRAHLEQRLAL AKRCSRE AN I AGVKA AAVAT I AS AVPTLAS VRMLPWAKAN I - NPTGQAL I I CTAAGMAYFVAADKK I LSLARRHS  
-----MS- TVTRAYLDQKLAL AKRCSRE ATL AGAKAAAVAT VAS AVPTLAS VRMLPWAKAN I - NPTGQAL I I CTAAGMAYFVAADKK I LSLARRHS  
----- - MLRRS A E A N L A G V K A A A V A T I A S A V P T L A S V R M L P W A K A N I - N P T G Q A L I I C T A A G M A Y F V A A D K K I L S L A R R H S  
-----MA- TVTRAHLEQRLAL AKRCSRE AN I AGVKA AAVAT I AS AVPTLAS VRMLPWAKAN I - NPTGQAL I I CTAAGMAYFVAADKK I LSLARRHS  
LQE- RES TTA- SFF I PSPVEEEKRARA KACTDEGMKEGLKAA FVACLATA I P T L T A V R M P V P W A K A N V - N Y T G Q A L I I S G A T I A T Y F V V A E Q T I L E C S R K Q N  
LQONCVSCKG- SFMIPS AVEER- AARARHCTDEGAKGFKAAC I AFVASS I P T L T A V R M F P K V K A S L - N Y T G Q A L I V S A A S I A S Y F I V S D Q T I H E C S R K S S  
-----MAGRS - FL I RSPKEEE - - - - SDAAVREAVFLGARNAA I AGSVVAVPTL I GCRVLPWAKANL - NYTAAQAL I I SAAC I AGFF I TADKT I L RNARQNT  
-----AASLDQKLAL AKRCSRE ATL AGAKAAAVAT I AS A I P T M A S V R M L P W A K A N I - N P T G Q A L I I S T V A G M A Y F I A A D K K I L S L A R R H S  
-----MP- APVNRKNLEQQLAMAKKSSRE AAL TGAKAAVAAT I VSA I P T L A S V R M S P W A T A N I - N P A G Q A L I I S T V A G M A Y F I A A D K K I L L A R K H S  
-----MP- TPATRKS LDEQRLAL AKQCSRE AAL AGKAAA I ATVATA I P T L A S V R M S R W A K A N I - N P A G Q A L I I S T V A G M A Y F I A A D K K V L S L A R Q H S  
-----MS- TVSRASLDQKLALAKRCSRE ATL AGTKAAAVAT I VSA I P T L A S V R M L P W A K A N I - N P T G Q A L I I S T V A G M A Y F I A A D K K I L S L A R R H S  
-----MS- TVSRASLDQKLALAKRCSRE ATL AGTKAAAVAT I AS A I P T L A S V R M L P W A K A N I - N P T G Q A L I I S T V A G M A Y F I A A D K K I L S L A R R H S  
-----MS- TVSHASLDQKLAL AKRCSRE ATL AGAKAAAVAT I AS AVPTLAS VRMLPWAKAN I - NPTGQAL I I S T V A G M A Y F I A A D K K I L S L A R R H S  
-----MS- TVTRAYLDQRLAMAKKSSRE ATL AGAKAAAVAT VAS AVPTLAS VRMLPWAKANL - NPTGQAL I I C T V A G M A Y F A T D K T I L S L A R R H S  
-----MASRS - FL I RSPKEEE - - - - SNAAVREAVL L GAKNGA I AGTVVAVPTLVGCRVLPWAKANL - NYTAAQAL I I SAAC I SGFF I TADKT I L RNARQNT  
-----MS- TVSRASLDQKLAL AKRCSRE ATL AGAKAAAVAT VAS A I P T L A S V R M L P W A K A N I - N P T G Q A L I I S T V A G M A Y F I A A D K K I L S L A R R H S  
-----MPNNTVTVSASVDONLAL AKQCSRE AA I AGFKA AAA I GTVASGI P T L V S V R M L P W A K A N I - N P A G Q A L I I S T V A G M A Y F I A A D K K I L A L A R Q H S  
-----MPNNTVTVSASVDQNLAL AKQCSRE AAL AGFKA AAA I GTVASGI A T L V S V R M L P W A K A N I - N P A G Q A L I I S T V A G M A Y F I A A D K K I L A L A R Q H S  
-----MS- TVTRASLDQKLAL AKRCSRE ATL AGAKAAAVAT I AS A I P T L A S V R M L P W A K A N I - N P T G Q A L I I S T V A G M A Y F I A A D K K I L S L A R R H S  
-----MS- TVSRASLDQKLAL AKRCSRE ATL AGAKAAAVAT I AS A I P T L A S V R M L P W A K A N I - N P T G Q A L I I S T V A G M A Y F I A A D K K I L S L A R R H S  
-----MS- TVSRASLEQKLAL AKRCSRE ATL AGAKAAAVAT I AS A I P T L A S V R M L P W A K A N I - N P T G Q A L I I S T V A G M A Y F I A A D K K I L S L A R R H S  
REDSWAKRRE- SLL I ASAYEEDR I RKSRECTGEGVRGTA A A A V C T A A S I P T L V A V R T I P W A K A N L - N Y T A Q A L I I S A A S I A A Y F I T A D K T I L E C A R R N T  
-----MPPVTEEQ - - - - NODVQD I I ODGFGKAVPTL C T A L S I V V F A S T R Y C P W A K A N I - N Y A G K T F I I S A L T A S A F A S A E Q S I V K H K R G E  
-----NVSLASMDQKLAMAKRYS YEGVVAGAKAAVVASV - - - - - FA I GKMSPWARTYL - NPTAKAL I I S T V A G M A Y F V V A D K T I L K T A R Q N S  
-----NVSLDS I DQKL A Y A K R C S H E G A K A G A A A V F A T V V T A I P T Y A C K I S P W A R A H L - N P T A K A L I V S T A A G M A Y F I V A D K T I L K T A R Q N S  
-----MEVS - LVYR - - - - Y A Q A L L E A V L L G A K N A A I A G T V V A V P T L V G C R V L P W A K A N L - N Y T A Q A L I I S A A C I A G F F I T A D K T I L R N A R Q N T  
LSRDR I R I T M P - S T V N S A S L D Q N L E L A K Q C S R - - - - G F K A A A V A T V A S A V P T L V S V R M L P W A K A N I - N P A G Q A L I V S T V A G M A Y F I A A D K K I L S L A R Q H S  
-----MS- TVSRASLDQKLAL AKRCSRE ATL AGAKAAAVAT I AS A I P T L A S V R M L P W A K A N I - N P T G Q A L I I S T V A G M A Y F I A A D K K I L S L A R R H S  
-----MS- TVSRASLDQKLAL AKRCSRE ATL AGAKAAAVAT I AS A I P T L A S V R M L P W A K A N I - N P T G Q A L I V S T V A G M A Y F I A A D K K I L S L A R R H S  
-----MSTTVSRASLDQKLAL AKRCSRE ATL AGAKAAAVAT I AS A I P T L A S V R M L P W A K A N I - N P T G Q A L I V S T V A G M A Y F I A A D K K I L S L A R R H S  
MRDFWWSRRKEGFLVASPSEEAK I LRSKKCTNEGVRAGFKAAS I ACVVSAVPTLTAVRMI PWAKANL - NYTAAQAL I I SAAS I AAYF I TADKT I L ECARKNS  
MAKGNVAANSPLERASLASLDQRLAVAKRCSHEGVMAGAKAAVVAT I A T A I P T F A S V R M L P W A K A N L - N H T A Q A L I I S T V A G A A Y F I V A D K T V L A T A R K N S  
MAKGNVAANSPLERASLASLDQKLAL AKRCAHEGV I AGTKAAVVATVATA I P T L A S V R M L P W A R A N L - N P T A Q A L I I S T V A G A A Y F I V A D K T I L A T A R K N S  
MSKGNDAA NSP L E R A T S H S L D Q K M A L A K R S S H E G V I A G A K A A V V A V V T A I P T L A S V R M P V P W A R A N L - N P T A Q A L I I I S T V A G A A Y F I V A D K T V L A T A R K N S  
-----MLP- - - - - WARTNL - NPTAAQAL I I S T V A G A A Y F M V A D K T I L A T A R K N S  
MARENVSNSPFERASLASLDQKLALARRCSHEGV I AGAKAA I AATVATA I P T L A S V R M L P W A R T N L - N H T A Q A L I I S T M A G A A Y F I V A D K T I L A S A R K N S  
MRDFWWSRRKEGFLVASPSEEAK I LRSKKCTNEGVRAGFKAAS I ACVVSAVPTLTAVRMI PWAKANL - NYTAAQAL I I SAAS I AAYF I TADKT I L ECARKNS  
LRDAWWSKRN - SFI I ASPDEERK I LRTKKCTNEGVRAGFKA AAVACVVSTVPTL AAVRMPVWAKANL - NYTAAQAL I I SAAS I AAYF I TADKT I L ECARKNA  
LRDMVI ANKNTSLQI ASPAEEQKMLRSSQCTAEGVRAGFKAAG I GCVTSTGPTLVAVRMI PWAKANL - NYTAAQAL I I SAVSVASFFVAADKI I L ACARKQS  
MAKRNVAANSPLERTSLAYLDQRLAMAKRCSHEGVMAGAKAAVVAT I A T A I P T L A S V R M L P W A R A N L - N P T A Q A L I I S T V A G A A Y F V A D K T V L A T A R K N S  
LRD I L L P N K K - G V F V A S P A E E R K I L R T K K C T S E G V R A G F K A A S I A C V A S A V P T L T A V R V I P W A K A N L - N Y T A Q A L I I S A A S I A A Y F I T A D K T I L E C A R K N A  
MANRNVA NS S F E R T T L A S L D Q K L A L A K R C S R E G V M A G A K A A V V A T I A T A I P T M A S V K M L P W A K A N L - N H T A Q A L I I S T V A G A A Y F I V A D K T V L A T A R K N S  
MAKRNVAANSSFERTSLASLDQKLAL AKRCSKEGVMAGAKAAVVAT I A T A I P T M A S V K M L P W A K A N L - N H T A Q A L I I S T V A G A A Y F I V A D K T V L A T A R K N S  
MAKGN - - - - S P L V R P S F A S L D Q K L A F A Q Q S H E G V L A G A K A A V V A G V A S A I P T V A S V R M P V W A R A N L - N H T A Q A L I I S T A M A A A F F I V S D K T I L A T A R R N S  
MTERNVAANSSI I DRTSLAYLDQRMAMAKRCSHQGV M A G A K A A V V A T I A T A I P T L A S V R M L P W A R A N L - N H T A Q A L I I S T V A G A A Y F I V A D K T V L A T A R K N S  
MAERNVAANSSI I DRTSLAYLDQRMAMAKRCSHQGV M A G A K A A V V A T I A T A I P T L A S V R M L P W A R A N L - N H T A Q A L I I S T V A G A A Y F I V A D K T V L A T A R K N S  
-----MAGAKAAVLL L L P L P F - Q L W L V G C Y L G Q A N L - N H T A Q A L I I S T V A G A A Y F I V A D K T V L A T A R K N S  
MAKGNVAANSPLERTSLAYLDQRMVAKRCSHEGVMAGAKAAVVAT I A T A I P T L A S V R M L P W A R A N L - N H T A Q A L I I S T V A G A A Y F I V A D K T I K L S C N H H G  
MEKRNVAANSPLERTSLAYLDQRMVAKRCSHEGVMAGAKAAVVAT I A T A I P T L A S V R M L P W A R A N L - N H T A Q A L I I S T V A G A A Y F I V A D K T V L A T A R K N S  
LRDMMVANKNRSLL I ASPAEEQKRLRTNQC TSEGV RAGFKAAG I GCVASTVPTMVAVRL I PWAKANL - NYTAAQAL I I SAVSCASFF I VADKT I L ACARKQS  
LRD V W W S K R N - S F I I A S P D E E R K I L R T K K C T N D G V R A G F K A A Y I A A I A S S V P T L T A V R M I P W A K A N L - N Y T A Q A L I I S A G - - - - Y F I T A D K T I L E C A R R N A  
MAKRNVAANSPLERTSLAYLDQRLAMAKRCSHEGVMAGAKAAVVAT I A T A I P T L A S V R M L P W A R A N L - N H T A Q A L I I S T V A G A A Y F I V A D K T V L A T A R K N S  
LRDMMVANKNTSLFI ASPAEEQK I LRSNQC T A E G V R A G F K A G I G C V A S T V P T L V A V R M I P W A K A N L - N Y T A Q A L I I S S V S V A S F F I V A E K T I M A C A R K H S  
-----MSLQSTATGLEGVRAGFKA AAVACVVSTVPTL AAVRMI PWAKANL - NYTAAQAL I I SGAS I AAYF I TADKT I L ECARKNA
