# Supplementary material for: Characterization of Early Nodulin 93 (ENOD93) on the mucilage secretion of aerial roots in sorghum
Source: Research Square preprint supplement (doi:10.21203/rs.3.rs-7686751/v1), 2025-10-08
Supplement: Supplementary file 1 [file 5244e94e583f97989ebc2174.docx]

Table S4. Ratio of synonymous and nonsynonymous substitution of *ENOD93* multigene family between *S. bicolor* andwild species *S. bicolor ssp. verticilliflorum*.

| Sequence | Method | Ka | Ks | Ka/Ks | P-Value (Fisher) |
| --- | --- | --- | --- | --- | --- |
| *Sobic.004G099900* | GY | NA | NA | NA | NA |
| *Sobic.010G031100* | GY | 0.0155 | 0.228987 | 0.067688 | 3.57E-09 |
| *Sobic.010G031400* | GY | 2.84E-05 | 0.028445 | 0.001 | 0.014476 |
| *Sobic.010G031600* | GY | 0.003581 | 7.16E-05 | 50 | 0.367879 |
| *Sobic.010G031900* | GY | NA | NA | NA | NA |
| *Sobic.010G032000* | GY | 2.26E-05 | 0.02263 | 0.001 | 0.025489 |
| *Sobic.010G032100* | GY | 7.19E-05 | 0.071867 | 0.001 | 0.006547 |
