# Supplementary material for: Characterization of Early Nodulin 93 (ENOD93) on the mucilage secretion of aerial roots in sorghum
Source: Research Square preprint supplement (doi:10.21203/rs.3.rs-7686751/v1), 2025-10-08
Supplement: Supplementary file 2 [file 613ba82f6a36655e3235db4d.docx]

Table S3. List of the predicted subcellular localizations and membrane association of *ENOD93* multigene family.

| Gene ID | Localizations | Signals | Cytoplasm | Nucleus | Extracellular | Cell membrane | **Mitochondrion** |
| --- | --- | --- | --- | --- | --- | --- | --- |
| *Sobic.010G031100* | Mitochondrion | Transmembrane domain | 0.151899993 | 0.1179 | 0.0557 | 0.091499999 | 0.904999971 |
| *Sobic.010G031900* | Mitochondrion | Transmembrane domain | 0.152400002 | 0.109 | 0.0623 | 0.0977 | 0.898500025 |
| *Sobic.010G032000* | Mitochondrion | Transmembrane domain | 0.155200005 | 0.112 | 0.058600001 | 0.094599999 | 0.898000002 |
| *Sobic.010G032100* | Mitochondrion | Transmembrane domain | 0.156800002 | 0.1132 | 0.0557 | 0.093199998 | 0.899500012 |
| *Sobic.010G031400* | Mitochondrion | Transmembrane domain | 0.155699998 | 0.1556 | 0.054299999 | 0.073399998 | 0.879800022 |
| *Sobic.010G031600* | Mitochondrion | Transmembrane domain | 0.158099994 | 0.1288 | 0.051800001 | 0.068800002 | 0.881600022 |
| *Sobic.004G099900* | Mitochondrion | Transmembrane domain | 0.191300005 | 0.1139 | 0.0407 | 0.054099999 | 0.874599993 |

Table S1 (Continued).

| Gene ID | Plastid | Endoplasmic reticulum | Lysosome/Vacuole | Golgi apparatus | Peroxisome | Peripheral | Transmembrane | Lipid anchor | Soluble |
| --- | --- | --- | --- | --- | --- | --- | --- | --- | --- |
| *Sobic.010G031100* | 0.274 | 0.0363 | 0.1306 | 0.027 | 0.1253 | 0.1693 | 0.9921 | 0.0981 | 0.0687 |
| *Sobic.010G031900* | 0.3025 | 0.0388 | 0.1404 | 0.0309 | 0.1357 | 0.1395 | 0.9932 | 0.1205 | 0.064 |
| *Sobic.010G032000* | 0.2848 | 0.0378 | 0.1371 | 0.0312 | 0.1339 | 0.1529 | 0.9927 | 0.1164 | 0.0667 |
| *Sobic.010G032100* | 0.2742 | 0.0381 | 0.1332 | 0.0293 | 0.1319 | 0.1604 | 0.9922 | 0.1039 | 0.0689 |
| *Sobic.010G031400* | 0.225 | 0.0383 | 0.1543 | 0.0272 | 0.0853 | 0.1952 | 0.9894 | 0.1028 | 0.0732 |
| *Sobic.010G031600* | 0.2033 | 0.04 | 0.2216 | 0.0364 | 0.0795 | 0.1942 | 0.988 | 0.0903 | 0.0787 |
| *Sobic.004G099900* | 0.217 | 0.0496 | 0.1828 | 0.0348 | 0.0401 | 0.139 | 0.992 | 0.049 | 0.0739 |
