# Supplementary material for: Characterization of Early Nodulin 93 (ENOD93) on the mucilage secretion of aerial roots in sorghum
Source: Research Square preprint supplement (doi:10.21203/rs.3.rs-7686751/v1), 2025-10-08
Supplement: Supplementary file 3 [file a4dedf9bf8d649afc6820e0a.docx]

Table S2. The physical and chemical parameters of ENOD93 gene family members in sorghum.

| Gene ID | Molecular weight (Da) | Theoretical pI | Instability index | Aliphatic index | Grand average of hydropathicity (GRAVY) |
| --- | --- | --- | --- | --- | --- |
| *Sobic.010G031100* | 12218.2 | 10.74 | 32.68 | 86.87 | 0.014 |
| *Sobic.010G031900* | 12201.22 | 11.26 | 33.02 | 87.74 | 0.075 |
| *Sobic.010G032000* | 12259.25 | 10.94 | 39 | 87.74 | 0.047 |
| *Sobic.010G032100* | 12230.26 | 11 | 34.36 | 87.74 | 0.052 |
| *Sobic.010G031400* | 12258.13 | 9.58 | 18.36 | 89.49 | 0.082 |
| *Sobic.010G031600* | 12261.13 | 9.8 | 20.25 | 87.01 | 0.089 |
| *Sobic.004G099900* | 10245.94 | 9.92 | 38.16 | 105.77 | 0.252 |
