# Supplementary material for: Characterization of Early Nodulin 93 (ENOD93) on the mucilage secretion of aerial roots in sorghum
Source: Research Square preprint supplement (doi:10.21203/rs.3.rs-7686751/v1), 2025-10-08
Supplement: Supplementary file 4 [file cefd91509fb3745ceed10901.docx]

**Table S1.** The primers used in this study.

| Primer name | Sequences |
| --- | --- |
| *Sobic.010G031900*-sense | CGACAGAGCTGCATCTTTTCAC |
| *Sobic.010G031900*-anti | TTGGCGAGGGCAAGCTTCTG |
| *Sobic.010G032000*-sense | GGCGGTGCTGACATACTGTATC |
| *Sobic.010G032000*-anti | TTGGCGAGGGCAAGCTTCTG |
| *Sobic.010G032100*-sense | TCTTCTCACTAGCCATCCAGCC |
| *Sobic.010G032100*-anti | TTGGCGAGGGCAAGCTTCTG |
| *Sobic.010G031100*-sense | AGCCCAGTGCTGCGCATCAGAC |
| *Sobic.010G031100*-anti | TTGGCGAGGGCAAGCTTCTG |
| *Sobic.010G031400*-sense | CATCCCATCTTCTTCATCGGCAG |
| *Sobic.010G031400*-anti | AAGGTTCTGGTCGACGGACGC |
| *Sobic.010G031600*-sense | ATCTCCTGCATCTATCGATCCC |
| *Sobic.010G031600*-anti | AAGGTTCTGGTCGACGGACGC |
| *Sobic.004G099900*-sense | CTCGCTCGCCAGCCATTATCC |
| *Sobic.004G099900*-anti | CTTTGCTCCCAGTAGTACAGCC |
| *β-actin*-sense | ATGTTCCCTGGGATTGCTGA |
| *β-actin*-anti | CGTACTCAGCCTTGGCAATC |
